# Supplementary material for: Late Jurassic teeth of plesiosauroid origin from the Owadów-Brzezinki Lägerstatte, Central Poland
Source: PeerJ. 2023 Jul 14;11:e15628. doi: 10.7717/peerj.15628 (PMC10351514; doi:10.7717/peerj.15628)
Supplement: Supplemental Information 1 — Data used in our PCoA. [file peerj-11-15628-s001.xlsx]

## Sheet: Modified dataset
		raw measurements
		C1					C2	C3		C4	C5	C5 rad	zC1	zC2	zC2b	zC3	zC4	zC5	D1	D2	D3	D4	D5	D6	D7	D8	D9	D10	D11	D12	D13	D14	D15
	Specimen	CH	CBL	CBW	CBLavg	C2	C2b	CBW/CBL	CBL/CBW	LLCurv	C8
Marmornectes candrewi	BEDFM 1999.201	25	11.5	11.5	11.5	2.17391	2.17391	1	1	1.14894	65	1.13446	-0.54073	-0.377046	-0.49168	0.502281	0.464561	-0.217868	0	0	0	0		0	0	2	2	2	0	0	0	0	0
Marmornectes-like	NHMHK R2439	26	10.5	10.5	10.5	2.47619	2.47619	1	1	1.1723	64	1.11701	-0.497772	0.122213	0.02599	0.502281	0.849169	-0.405234	0	0	0	0		0	0	2	2	2	0	0	0	0	0
Liopleurodon ferox	NHMUK PV R3536	75	27	31	29	2.77778	2.58621	1.14815	0.870968	1.22	57	0.994838	1.60715	0.620332	0.2144	1.54545	1.63453	-1.7168	0	0	0	0		1	0	2	0	3	0	0	0	0	0
Peloneustes-like -	OUMNH J.02247	37	15	14.74	14.87	2.46667	2.48823	0.982667	1.01764				-0.0252394	0.106483	0.0466108	0.380229			0	0	0	0		0	0	2	2	2	0	0	0	0	0
Peloneustes philarchus	NHMUK PV R8574	30	10.5	10.5	10.5	2.85714	2.85714	1	1	1.11	70	1.22173	-0.325942	0.751416	0.678397	0.502281	-0.176469	0.718963	0	0	0	0		0	0	2	2	2	0	0	0	0	0
Simolestes vorax	NHMUK PV R3319	82.4	29.85	32.835	31.3425	2.76	2.62902	1.1	0.909091	1.11	62	1.0821	1.92503	0.590969	0.287718	1.20642	-0.176469	-0.779966	0	0	0	0		0	0	2	0	1	0	0	0	0	0
Simolestes vorax	NHMUK PV R3170	65.5	22	24.2	23.1	2.97727	2.8355	1.1	0.909091	1.12	65	1.13446	1.19905	0.949829	0.641328	1.20642	-0.0118327	-0.217868	0	0	0	0		0	0	2	0	1	0	0	0	0	0
Pliosaurus' andrewsi	CAMSM J63532etc	39	24.4833			1.59292				1.14902	68	1.18682	0.0606756	-1.33665			0.466021	0.344231	0	0	0	0		?	0	1	0	1	0	0	0	1	1
Pliosaurus' andrewsi	NHMUK R3891	41.1	23.24	23.24	23.24	1.76395	1.7685	1	1	1.05461	68	1.18682	0.150886	-1.05417	-1.18597	0.502281	-1.08838	0.344231	0	0	0	0		?	0	1	0	1	0	0	0	1	1
Pliosaurus carpenteri	BRSMG Cd6172	100	51			1.96				1.18	65	1.13446	2.68109	-0.730357			0.975983	-0.217868	0	0	0	1		1	0	2	0	3	0	2	0	1	0
Pliosaurus westbutyensis	BRSMG Cc332	110	49	49.6477	49.3239	2.45	2.23016	1.01322	0.986954	1.13	65	1.13446	3.11066	0.0789552	-0.395357	0.595361	0.152803	-0.217868	0	0	0	1		1	0	2	0	3	0	2	0	1	0
Pliosaurus kevani	DORCM G.13,675	48	29	34	31.5	1.65517	1.52381	1.17241	0.852941		60	1.0472	0.447293	-1.23383	-1.60503	1.71632		-1.1547	0	0	0	1		1	0	2	0	2	0	1	0	1	0
Pliosaurus brachydeirus	OUMNH J.09245 - 951-81	63.5	30.23			2.1				1.23529	60	1.0472	1.11314	-0.499125			1.88632	-1.1547	0	0	0	1			0	2	0	3	0	2	0		0
Pliosaurus ?brachyspondylus	CAMSM J.35991	41	18			2.27778					72	1.25664	0.146591	-0.205497				1.09369	0	0	0	1			0	2	0	3	0	2	0		0
Liopleurodon ferox	NHMUK R2680	72	30	32	31	2.4	2.32258	1.06667	0.9375	1.2	57	0.994838	1.47827	-0.00362776	-0.237077	0.971709	1.30526	-1.7168	0	0	0	0		1	0	2	0	3	0	0	0	0	0
Simolestes vorax	CAMSM TN 3752	71	25.1	29.3	27.2	2.82814	2.61029	1.16733	0.856655	1.12	65	1.13446	1.43532	0.703506	0.255651	1.68053	-0.0118327	-0.217868	0	0	0	0		0	0	2	0	1	0	0	0	0	0
Simolestes vorax	CAMSM TN 3752	83.43	29.5	32.5	31	2.82814	2.69129	1.10169	0.907692	1.12	60	1.0472	1.96928	0.703506	0.394363	1.21836	-0.0118327	-1.1547	0	0	0	0		0	0	2	0	1	0	0	0	0	0
Liopleurodon ferox	GLAHM V1138	87.1	35.1	44.6	39.85	2.48148	2.1857	1.27066	0.786996	1.22581	58	1.01229	2.12693	0.130952	-0.471501	2.40808	1.73012	-1.52943	0	0	0	0		1	0	2	0	3	0	0	0	0	0
Liopleurodon ferox - Simolestes	CAMSM J60900	110.2	31.34	40	35.67	3.51627	3.08943	1.27632	0.7835	1.11888	65	1.13446	3.11925	1.84007	1.07621	2.448	-0.0302535	-0.217868	0	0	0	0		1	0	2	0	2	0	0	0	0	0
Pliosauridae indet	BRSMG Cd5588	63.5	25			2.54							1.11314	0.227604					0	0	0	0		1	0		0	3	0	0	0	0	0
Pliosauridae indet	CAMSM J13303	85	37.8	38.13	37.965	2.24868	2.2389	1.00873	0.991345	1.09212	63	1.09956	2.03672	-0.253561	-0.380379	0.563754	-0.470818	-0.5926	0	0	0	0		1	0	2	0	2	0	0	0	1	0
Pliosauridae indet	YORYM 2007.2985.1	48.6	21.4	24.3	22.85	2.27103	2.12691	1.13551	0.880658	1.15514	61	1.06465	0.473068	-0.216645	-0.572168	1.45649	0.566637	-0.967332	0	0	0	0		1	0	2	0	2	0	0	0	0	1
Pliosauridae indet	NHMUK R47044	40	17.5	19.5	18.5	2.28571	2.16216	1.11429	0.897436	1.10349	62	1.0821	0.103633	-0.192389	-0.511805	1.30701	-0.283635	-0.779966	0	0	0	0		1	0	1	0	2	0	0	0	0	1
Pliosaurus sp.	MJML K821	73.86	37.4	37.25	37.325	1.97487	1.97883	0.995989	1.00403	1.14613	60	1.0472	1.55818	-0.705803	-0.825765	0.47404	0.418333	-1.1547	0	0	0	0		1	0	2	0	3	0	2	0	0	0
Pliosaurus kevani	CAMSM J29552	65.61	26.31	27.03	26.67	2.49373	2.46007	1.02737	0.973363	1.133	66.5	1.16064	1.20378	0.15118	-0.0016217	0.694977	0.202194	0.0631816	0	0	0	1		1	0	2	0	2	0	1	0	1	0
Pliosauridae indet - I	CAMSM J29544	49.15	26.7	29	27.85	1.84082	1.76481	1.08614	0.92069	1.23381	59	1.02974	0.496695	-0.927195	-1.19229	1.10885	1.86187	-1.34206	0	0	0	0		1	0	2	0	2	0	0	0	1	1
Pliosauridae indet - I	CAMSM J29547	74.43	32.59	38.21	35.4	2.28383	2.10254	1.17245	0.852918	1.18077	60	1.0472	1.58266	-0.195502	-0.613907	1.71654	0.988707	-1.1547	0	0	0	0		1	0	2	0	2	0	0	0	1	1
Pliosaurus sp.	CAMSM J29553	79.1	30.21	31.33	30.77	2.61834	2.57069	1.03707	0.964252	1.02657	72	1.25664	1.78327	0.356992	0.187819	0.763333	-1.54997	1.09369	0	0	0	1		1	0	2	0	3	0	2	0	0	0
Pliosauridae indet - I	CAMSM J29557	82.24	36	39.8	37.9	2.28444	2.16992	1.10556	0.904523	1.16382	58	1.01229	1.91816	-0.194486	-0.498517	1.24554	0.709564	-1.52943	0	0	0	0		1	0	2	0	2	0	0	0	1	1
Pliosauridae indet - I	MJML K1490	42.79	32.17			1.33012					60	1.0472	0.223485	-1.7707				-1.1547	0	0	0	0		1	0	2	1	2	0	0	0	1	1
Pliosaurus sp.	MJML K1785	61.82	26.94	26	26.47	2.29473	2.33547	0.965108	1.03615	1.11011	68	1.18682	1.04097	-0.177499	-0.214996	0.256589	-0.174719	0.344231	0	0	0	1		1	0	2	0	3	0	2	0	0	0
Pliosaurus sp.	MJML K1008	76.32	34.98	32.16	33.57	2.18182	2.27346	0.919383	1.08769	1.1299	63	1.09956	1.66385	-0.36399	-0.321202	-0.0653812	0.151094	-0.5926	0	0	0	1		1	0	2	0	3	0	2	0	0	0
Pliosaurus ('grandis') sp.	GLAHM V1149	84.8	38.3	37.4	37.85	2.2141	2.24042	0.976501	1.02406	1.1375	67	1.16937	2.02813	-0.310672	-0.377778	0.336816	0.27628	0.156865	0	0	0	1		1	0	2	0	3	0	2	0	0	0
Muraeonosaurus leedsi	NHMUK R2421	30	9.1	8	8.55	3.2967	3.50877	0.879121	1.1375	1.09603	63	1.09956	-0.325942	1.47742	1.79436	-0.34888	-0.40642	-0.5926	1	0	0	0		0	0	3	3	1	0	0	0	0	0
Cryptoclidus eurymerus	PETMG R.283.412	18.21	5.73			3.15							-0.832412	1.23512					0	0	0	0		0	0	3	0	1	0	0	0	0	0
Tricleidus seeleyi	NHMUK R3539	23.5	6	6	6	3.91667	3.91667	1	1	1.07377	61	1.06465	-0.605166	2.50139	2.4929	0.502281	-0.772912	-0.967332	0	0	0	0		0	0	3	2	1	0	0	0	0	0
Kimmerosaurus langhami	NHMUK R8431	13.5	3.7	3.17143	3.43571	3.64	3.92931	0.857143	1.16667	1.13195	64	1.11701	-1.03474	2.04443	2.51456	-0.503637	0.184886	-0.405234	1	0	0	0		0	0	0	0	0	0	0	0	0	0
Kimmerosaurus langhami	NHMUK R8431	12	3.5	3.31081	3.40541	3.42857	3.52381	0.945946	1.05714	1.20314	54	0.942478	-1.09918	1.69522	1.82011	0.121663	1.35696	-2.27889	1	0	0	0		0	0	0	0	0	0	0	0	0	0
Kimmerosaurus langhami	NHMUK R8431	11	3	2.5	2.75	3.66667	4	0.833333	1.2	1.16383	62	1.0821	-1.14214	2.08847	2.63562	-0.67129	0.709706	-0.779966	1	0	0	0		0	0	0	0	0	0	0	0	0	0
Plesiosauroidea indet	NHMUK PV R2861	35	10	8	9	3.5	3.88889	0.8	1.25	1.0659	68	1.18682	-0.111155	1.8132	2.44533	-0.906004	-0.902592	0.344231	1	0	0	0		0	0	3	2	1	0	0	0	0	0
Plesiosauroidea indet	OUMNH J.47559	34	6.75			5.03704							-0.154112	4.35186						0	0	0		0	0		0	1	0	0	0	0	0
Plesiosauroidea indet	BRSMG Cd5593	33	7.7			4.28571							-0.19707	3.11093						0	0	0		0	0		0	1	0	0	0	0	0
Plesiosauroidea indet [Muraenosaurus]	CAMSM unnumbered	42.37	12.7	12.35	12.525	3.33622	3.38283	0.972441	1.02834	1.17909	58	1.01229	0.205443	1.54269	1.57868	0.308226	0.961018	-1.52943		0	0	0		0	0	3	0	1	0	0	0	0	0
Plesiosauroidea indet	CAMSM J30070	34.54	8.23	7.4	7.815	4.19684	4.41971	0.899149	1.11216	1.17313	57	0.994838	-0.130915	2.96414	3.35439	-0.207851	0.862904	-1.7168	1	0	0	0		0	0	3	0	1	0	0	0	0	0
Plesiosauroidea indet	MJML K263	15.99	5.76	5.45	5.605	2.77604	2.85281	0.946181	1.05688	1.04652	70	1.22173	-0.927777	0.617465	0.670976	0.123315	-1.22159	0.718963	1	0	0	0		0	0	3	2	1	0	0	0	0	0
Metriorhynchus superciliosus	NHMUK PV R2051	17.87	7.1	5.39441	6.24721	2.4958	2.86048	0.759777	1.31618	1.08466	65	1.13446	-0.847017	0.154601	0.684109	-1.18923	-0.593586	-0.217868	1	1	0	0		0	0	3	2	1	0	0	0	0	0
Gracilineustes leedsi	NHMUK R3014	12.87	5			2.5406							-1.0618	0.228593					1	1	0	0		0	0	3	3	1	0	0	0	0	0
Metriorhynchus superciliosus	PETMG R74	21.75	8.94	6.42	7.68	2.43289	2.83203	0.718121	1.39252	1.08239	70	1.22173	-0.680342	0.0506885	0.635391	-1.48255	-0.631049	0.718963	1	1	0	0		0	0	3	2	1	0	0	0	0	0
Metriorhynchus superciliosus	CAMSM J65584	15.62	6.88	5.52	6.2	2.27035	2.51935	0.802326	1.24638	1.08379	70	1.22173	-0.943672	-0.217767	0.0999119	-0.889629	-0.607936	0.718963	1	1	0	0		0	0	3	2	1	0	0	0	0	0
Gracilineustes leedsi	GLAHM V1009	14.6	6.1	4.9	5.5	2.39344	2.65455	0.803279	1.2449	1.03002	78	1.36136	-0.987488	-0.0144583	0.331435	-0.882917	-1.49315	2.21789	1	1	0	0		0	0	3	3	1	0	0	0	0	0
[Metriorhynchus superciliosus]	CAMSM unnumbered	28.56	11.7	11	11.35	2.44103	2.5163	0.940171	1.06364	1.00139	77	1.3439	-0.387801	0.0641326	0.0946795	0.080999	-1.9646	2.03053	1	1	0	0		0	0	3	2	1	0	0	0	0	0
Metriorhynchus superciliosus	NHMUK 47044	19	7.9			2.40506							-0.798475	0.00473507					1	1	0	0		0	0		2	1	0	0	0	0	0
Metriorhynchidae indet	DORCM G.0116	27.3	9.3			2.93548				1.04037	77	1.3439	-0.441928	0.880809			-1.3229	2.03053	1	1	2	1	1	0	0	3	3	2	0	0	0	0	0
Metriorhynchidae indet	DORCM G.0096	21.27	9.6	7.82445	8.71223	2.21212	2.4414	0.815047	1.22692	1.05934	73	1.27409	-0.700962	-0.313939	-0.0335965	-0.800052	-1.01059	1.28106	1	1	2	1	1	0	0	3	3	2	0	0	0	0	0
Metriorhynchidae indet	DORCM G.0096	20.53	8.47	7.88	8.175	2.42385	2.51131	0.930342	1.07487	1.07346	73	1.27409	-0.73275	0.0357624	0.0861431	0.0117919	-0.778039	1.28106	1	1	2	1	1	0	0	3	3	2	0	0	0	0	0
Metriorhynchus' brachyrhynchus	NHMUK PV R2618	25	9.36			2.67							-0.54073	0.44232					2	1	1	0	0	0	0	0	0	1	0	0	0	0	0
Metriorhynchus' brachyrhynchus	NHMUK PV R3804	27.83	9.83	7.6	8.715	2.83113	3.19334	0.773143	1.29342	1.13689	70	1.22173	-0.41916	0.70845	1.25416	-1.09511	0.26618	0.718963	2	1	1	0	0	0	0	0	0	0	0	0	0	0	0
Tyrannoneustes lythrodectikos	NHMUK PV R3939	29.84	18.63	9.85	14.24	1.60172	2.09551	0.528717	1.89137	1.07599	70	1.22173	-0.332815	-1.32212	-0.625958	-2.81622	-0.736338	0.718963	2	1	1	0	0	0	0	0	0	0	0	0	0	0	0
Suchodus durobrivensis	Fr. Spp	50	24			2.08							0.533209	-0.532158					1	1	1				0	1	0					0	0
Suchodus durobrivensis	NHMUK PV R2039	30	13.4	11	12.2	2.23881	2.45902	0.820896	1.21818	1.1617	65	1.13446	-0.325942	-0.269865	-0.00342178	-0.75887	0.674743	-0.217868	1	1	1	0	0	0	0	1	0	1	0	0	0	0	0
Veticoneustex rapax	NHMUK R4763 *juvenile	25	10.8			2.3085							-0.54073	-0.154755					1	1				0	0	0		0	0	0	0	0	0
Melksham monster	NHMUK PV OR 46797	32.83	12.33			2.66201							-0.204372	0.429125					2	1	1	0	0	0	0		0	1	0	0	1	0	0
Torvoneustes carpenteri	BRSMG Ce17365	34.9	18.2	15.9	17.05	1.91758	2.04692	0.873626	1.14465	1.13419	65	1.13446	-0.11545	-0.800417	-0.709163	-0.38757	0.221847	-0.217868	0	1	2	1	1	0	1	3	3	1	1	0	0	0	1
Torvoneustes coryphaeus	MJML J1863	28	14.62	14.03	14.325	1.915	1.95462	0.959644	1.04205	1.15794	64	1.11701	-0.411857	-0.804682	-0.867226	0.218119	0.612848	-0.405234	0	1	2	1	1	0	1	3	3	1	0	0	0	0	1
Passmore's croc	OUMNH J.1583	23.26	13	12.72	12.86	1.89723	1.80871	0.978462	1.02201	1.16922	59	1.02974	-0.615476	-0.834037	-1.11712	0.350619	0.798525	-1.34206	0	1	1	0	0	0	1	3	3	1	0	0	0	0	1
Geosaurus giganteus	NHMUK PV OR37020	29.26	10.9	7	8.95	2.69	3.26927	0.642202	1.55714	1.04301	73	1.27409	-0.357731	0.475353	1.3842	-2.01713	-1.27934	1.28106	2	1	2	1	1	0	0	0	0	0	0	0	1	0	0
Plesiosuchus manselii	NHMUK PV OR40103	47.9	21.84	17.11	19.475	2.19322	2.45956	0.783425	1.27645				0.442998	-0.345152	-0.00248475	-1.02272			1	1	2	1	1	0	0	0	0	0	0	0	0	0	0
Dakosaurus maximus	CAMSM J29449	54.17	22.8	16.2486	19.5243	2.37588	2.77449	0.712659	1.4032	1.09206	67	1.16937	0.712341	-0.0434704	0.536848	-1.52101	-0.471904	0.156865	1	1	3	1	1	0	0	0	0	0	0	0	0	0	0
Metriorhynchidae - sp M. hastifer	DORCM G.0114	19.84	7.76			2.5567							-0.762391	0.255189					1	1	2	1	1	0	0	3	3	2	0	0	0	0	0
Metriorhynchidae - sp M. hastifer	DORCM G.0122	22.5	9.95			2.26131				1.05409	70	1.22173	-0.648124	-0.232702			-1.09687	0.718963	1	1	2	1	1	0	0	3	3	2	0	0	0	0	0
Suchodus durobrivensis	NHMUK R1994	32.18	15.44	11.9	13.67	2.0842	2.35406	0.770725	1.29748	1.14392	67.5	1.1781	-0.232295	-0.525227	-0.183167	-1.11214	0.38197	0.250548	1	1	1	0	0	0	0	0	0	0	0	0	0	0	0
Blue Peter croc	PETMG R248	31.61	11.2	7	9.1	2.82232	3.47363	0.625	1.6	1.10975	66	1.15192	-0.256781	0.693903	1.73417	-2.13825	-0.180665	-0.0305015	2	1	1	0	0	0	0	0	0	0	0	0	0	0	0
Blue Peter croc	PETMG R248	27.89	11.59	8.39	9.99	2.40638	2.79179	0.7239	1.38141	1.10795	70	1.22173	-0.416583	0.00691777	0.566478	-1.44186	-0.210264	0.718963	2	1	1	0	0	0	0	0	0	0	0	0	0	0	0
Mr Leeds Dakosaur	NHMUK PV R3321		12.7	10.65	11.675			0.838583	1.19249							-0.634327			1	1	1			0	0	0	0	0		0	0	0	0
Geosaurie indet [Dakosaur]	NHMUK PV R486		22	18.93	20.465			0.860455	1.16218							-0.480318			1	1	2	1	1	0	0	0	0	0		0	0	0	0
Geosaurie indet	NHMUK 47990	23.47	11.75	10.91	11.33	1.99745	2.07149	0.928511	1.07699	1.04611	73	1.27409	-0.606455	-0.668508	-0.667084	-0.00110616	-1.22831	1.28106	1	1	2	1	1	0	1	3	3	1	0	0	0	0	0
Geosaurie indet	CAMSM unnumbered	38.85	13.78	13.12	13.45	2.8193	2.88848	0.952104	1.0503	1.1416	67	1.16937	0.054232	0.688918	0.732056	0.165028	0.343776	0.156865	2	1	1	0	0	0	0	0	0	1	0	0	0	0	0
Torvoneustes-like	CAMSM J13309	29.23	14.71	12.2	13.455	1.98708	2.17243	0.829368	1.20574	1.00227	77	1.3439	-0.35902	-0.685624	-0.494226	-0.699213	-1.95016	2.03053	1	1	2	1	1	0	1	3	3	1	0	0	0	0	1
Torvoneustes -like	YORYM 2016.306	27.1	12.2	8.5	10.35	2.22131	2.61836	0.696721	1.43529	1.09791	68	1.18682	-0.450519	-0.29876	0.269461	-1.63323	-0.375455	0.344231	0	1	2	1	1	0	1	3	3	1	0	0	0	0	1
Tyrannoneustes -like	YORYM 2016.308	23.6	11.1			2.12613				1.08618	72	1.25664	-0.60087	-0.455974			-0.568689	1.09369	2	1	1	0	0	0	0	0	0	0	0	0	0	0	0
Torvoneustes -like	YORYM 2016.312	23.5	10.5			2.2381							-0.605166	-0.271039					1	1	2	1	1	0	1	3	3	1	1	0	0	0	0
Geosauri indet	NHMUK PV R36638	14	6.45	5.25	5.85	2.17054	2.39316	0.813953	1.22857	1.18324	68	1.18682	-1.01326	-0.382613	-0.116201	-0.807752	1.02927	0.344231	2	1					0	1	0	1	0	0	1	0	1
Geosauri indet	NHMUK PV R 36839	16	7.3	5.7	6.5	2.19178	2.46154	0.780822	1.2807	1.05656	71.5	1.24791	-0.927348	-0.347535	0.000897434	-1.04105	-1.05621	1.00001	2	1					0	1	0	1	0	0	1	0	1
Torvoneustes carpenteri	BRSMG Cd7203	26.54	15.53	15	15.265	1.70895	1.73862	0.965873	1.03533	1.10191	65	1.13446	-0.474575	-1.14501	-1.23715	0.261975	-0.309585	-0.217868	0	1	2	1	1	0	1	3	3	2	1	0	0	0	1
Torvoneustes carpenteri	BRSMG Ce17365	31.35	18.04	15.15	16.595	1.7378	1.88912	0.8398	1.19076	1.11046	71	1.23918	-0.26795	-1.09735	-0.979402	-0.625752	-0.16886	0.906329	0	1	2	1	1	0	1	3	3	2	1	0	0	0	1
Torvoneustes coryphaeus	MJML J1863	21.97	12	11.78	11.89	1.83083	1.84777	0.981667	1.01868	1.14223	65	1.13446	-0.670891	-0.943697	-1.05022	0.373188	0.354205	-0.217868	0	1	2	1	1	0	1	3	3	2	0	0	0	0	1
Plesiosuchus sp.	MJML K434	47	19.84	17.84	18.84	2.36895	2.49469	0.899194	1.11211	1.07411	70	1.22173	0.404336	-0.0549091	0.0576753	-0.20754	-0.767395	0.718963	1	1	2	1	1	0	0	0	0	0	0	0	0	0	0
Dakosaurus sp.?	CAMSM J29425	53.2	24.6	21.2	22.9	2.1626	2.32314	0.861789	1.16038	1.08727	70	1.22173	0.670673	-0.395729	-0.236112	-0.470924	-0.550639	0.718963	1	1	3	1	1	0	0	0	0	0	0	0	0	0	0
Dakosaurus sp.?	CAMSM J29448	50.47	19.8	16.1073	17.9536	2.54899	2.81113	0.8135	1.22926	1.04796	71	1.23918	0.553399	0.242453	0.599592	-0.810945	-1.19779	0.906329	1	1	3	1	1	0	0	0	0	0	0	0	0	0	0
Torvoneustes ?	NHMUK 44300	26.55	12.36	11.36	11.86	2.14806	2.23862	0.919094	1.08803	1.06731	69.5	1.213	-0.474146	-0.419749	-0.38087	-0.0674138	-0.879259	0.62528	0	1	2	1		0	1	3	3	2	1	0	0	0	1
Torvoneustes?	NHMUK R1781	28.87	12.92	12.53	12.725	2.23452	2.26876	0.969814	1.03113	1.18551	61	1.06465	-0.374484	-0.276944	-0.329245	0.28973	1.06676	-0.967332	0	1	2	1		0	1	3	3	2	0	0	0	0	1
Torvoneustes?	NHMUK R1781	21.66	12	11.62	11.81	1.805	1.83404	0.968333	1.0327	1.17843	62	1.0821	-0.684208	-0.986364	-1.07374	0.279302	0.950138	-0.779966	0	1	2	1	1	0	1	3	3	2	0	0	0	0	1
Geosaurus sp.	MJML K461	22.79	9.38	6.17	7.775	2.42964	2.93119	0.657783	1.52026	1.01813	80	1.39626	-0.635666	0.0453233	0.805207	-1.90742	-1.68892	2.59262	2	1	2	1	1	0	0	0	0	1	0	0	0	0	1
Plesiosuchus manselii	MJML K2061	49.29	22.84	21.31	22.075	2.15806	2.23284	0.933012	1.0718	1.11863	66	1.15192	0.502709	-0.403236	-0.39076	0.0305917	-0.0344389	-0.0305015	1	1	2	1	1	0	0	0	0	0		0	0	0	0
Myctersuchus sutus	NHMUK 3617																		0	1	0	0		0	0	3	3	1	0	0	0	0	0
Steneosaurus' herberti	MNHN.F 1890-13	30	10		10	3	3						-0.325942	0.987367	0.923049				0	1					0	3	3	2	0	0	0		0
Steneosaurus' leedsi	NHMUK R3806	20	7.3	6.7	7	2.73973	2.85714	0.917808	1.08955	1.38107	65	1.13446	-0.755518	0.557484	0.678397	-0.0764664	4.28636	-0.217868	0	1	0	0	0	0	0	3	3	1	0	0	0	0	0
Steneosaurus' leedsi	CAMSM J1420																		0	1	0	0	0	0	0	3	3	1	0	0	0	0	0
Steneosaurus' edwardsi	PETMG R178																		0	1	0	0	0	0	1	3	3	2	0	0	0	1	0
Lemmysuchus obtusidens	NUMUK PV R3168	37	16	16	16	2.3125	2.3125	1	1	1.1252	70	1.22173	-0.0252394	-0.148148	-0.254341	0.502281	0.0738593	0.718963	0	1	1	1	0	1	1	3	3	2	1	0	0	1	1
Machimosaurus buffetauti	DFMMh F330	35.7	17.5	17.14	17.32	2.04	2.0612	0.979429	1.021	1.15286	69	1.20428	-0.0810842	-0.598225	-0.684707	0.357429	0.529136	0.531597	0	1	1	1	0	1	1	3	3	2	1	0	0	1	1
Steneosaurus' durobrivensis	NHMUK PV R3701	21	7.3	6.7	7	2.87671	3	0.917808	1.08955	1.19211	61	1.06465	-0.71256	0.783738	0.923049	-0.0764664	1.17544	-0.967332	0	1	1	0	0	0	0	3	3	1	0	0	0	0	0
Steneosaurus' obtusidens	CAMSM J65408	55.13	25.39	24.4	24.895	2.17133	2.2145	0.961008	1.04057	1.13462	65	1.13446	0.753581	-0.381317	-0.422171	0.227723	0.228789	-0.217868	0	1	1	1	0	1	1	3	3	2	1	0	0	1	1
Steneosaurus' obtusidens	DORCM G3939	26.04	12.46	11.58	12.02	2.08989	2.16639	0.929374	1.07599				-0.496054	-0.515827	-0.504565	0.00497311			0	1	1	1	0	1	1	3	3	2	1	0	0	1	1
Steneosaurus' obtusidens	OUMNH J40669	15.3	9	9	9	1.7	1.7	1	1	1.12096	63	1.09956	-0.957418	-1.15979	-1.30329	0.502281	0.00390375	-0.5926	0	1	1	1	0	1	1	3	3	2	1	0	0	1	1
Steneosaurus' megarhinus	DORCM G05067 i-v	17.13	7.24	6.53	6.885	2.36602	2.48802	0.901934	1.10873	1.07304	70	1.22173	-0.878806	-0.0597476	0.0462444	-0.188246	-0.784913	0.718963	0	1	0	0	0	0	0	3	3	1	0	0	0	0	0
Machimosaurussp.	MJML K839	19.3	13.63	12.59	13.11	1.41599	1.47216	0.923698	1.08261	1.09126	68	1.18682	-0.785588	0.293671	0.203771	0.502281	-0.485074	0.344231	0	1	1	1	0	1	1	3	3	2	1	0	0	1	1
Opthtalmosaurus icenicus	NHMUK R4753	12.9	5	5	5	2.58	2.58	1	1	1.07601	74	1.29154	-1.06052	0.293671	0.203771	-0.599487	-0.736056	1.46843	0	0	0	0		0	0	3	3	1	0	0	0	0	0
Ophthalmosauridae indet	CAMSM unnumbered	18.37	9.97	8.41	9.19	1.84253	1.99891	0.843531	1.18549	1.10385	66	1.15192	-0.825538	-0.924382	-0.791382	-0.599487	-0.277698	-0.0305015	0	0	0	0		0	0	3	3	1	0	0	0	0	0
Ophthalmosauridae indet	CAMSM J29813-22_III	13.77	7.25	6.44	6.845	1.89931	2.01169	0.888276	1.12578	1.08972	72	1.25664	-1.02314	-0.830596	-0.769503	-0.284416	-0.510399	1.09369	0	0	0	0		0	0	3	3	1	0	0	0	0	0
Mepal Ophthalmosauridae	CAMSM X3925 - X39251n	22.31	15.23	15.22	15.225	1.46487	1.46535	0.999343	1.00066				-0.656286	-1.54814	-1.70514	0.497657			0	0	0	0		0	0	3	3	1	0	0	0	0	1
Mepal Ophthalmosauridae	CAMSM X3925 - X39251x	19.14	12.4	12.48	12.44	1.54355	1.53859	1.00645	0.99359	1.06791	64	1.11701	-0.792461	-1.41819	-1.57972	0.547709	-0.869414	-0.405234	0	0	0	0		0	0	3	3	1	0	0	0	0	1
Ophthalmosauridae indet	CAMSM J61336	14.92	7.36	7.38	7.37	2.02717	2.02442	1.00272	0.99729	1.09813	72	1.25664	-0.973742	-0.619409	-0.747692	0.521415	-0.371878	1.09369	0	0	0	0		0	0	3	3	1	0	0	0	0
Ophthalmosauridae indet	MJML K123 A	19.87	12	11.47	11.735	1.65583	1.69323	0.955833	1.04621	1.0787	69	1.20428	-0.761102	-1.23274	-1.31489	0.191285	-0.691822	0.531597	0	0	0	0		0	0	3	3	1	0	0	0	0
Ophthalmosauridae indet	MJML K123	21.99	11.85	11.45	11.65	1.8557	1.88755	0.966245	1.03493	1.08252	69.5	1.213	-0.670032	-0.902632	-0.98209	0.264596	-0.628842	0.62528	0	0	0	0		0	0	3	3	1	0	0	0	0	1
Ophthalmosauridae indet	MJML K123	20	12.1	12.05	12.075	1.65289	1.65631	0.995868	1.00415	1.06809	67.5	1.1781	-0.755518	-1.23759	-1.3781	0.473184	-0.866466	0.250548	0	0	0	0		0	0	3	3	1	0	0	0	0	1
Ophthalmosauridae indet	MJML K123	20.16	11.5	10.5	11	1.75304	1.83273	0.913043	1.09524	1.02815	72.5	1.26536	-0.748644	-1.07218	-1.07598	-0.110017	-1.52407	1.18738	0	0	0	0		0	0	3	3	1	0	0	0	0	1
Ophthalmosauridae indet	MJML K1009	12	7.1	7.1	7.1	1.69014	1.69014	1	1	1			-1.09918	-1.17607	-1.32017	0.502281	-1.98747		0	0	0	0		0	0	3	3	1	0	0	0	0	0
Cryptoclididae indet	ZPAL R. 11/OB/T4	28.57	10.23	7.98001	9.10501	2.79	3.13783	0.78006	1.28195	1.21			-0.387371	0.640519	1.1591	-1.04641	1.46989		0	0	0	0		0	0	3	3	1	0	0	0	0	0
	AVERAGE	37.5875	16.3281	16.8736	17.0448	2.4022	2.46101	0.928668	1.10468	1.12072	66.1628	1.15476
	STDV	23.2788	10.1816	11.2747	10.4614	0.605452	0.583919	0.142017	0.188074	0.06074	5.33715	0.0931508
	VAR	541.903	103.664	127.118	109.441	0.366572	0.340961	0.0201687	0.0353717	0.00368935	28.4851	0.00867707
